# Supplementary material for: Dimeric Labdane Diterpenes: Synthesis and Antiproliferative Effects
Source: Molecules. 2013 May 21;18(5):5936–53. doi: 10.3390/molecules18055936 (PMC6270601; doi:10.3390/molecules18055936)

## Supplementary Materials

**Figure S1.**  $^1\text{H}$ -NMR of Compound **3**.

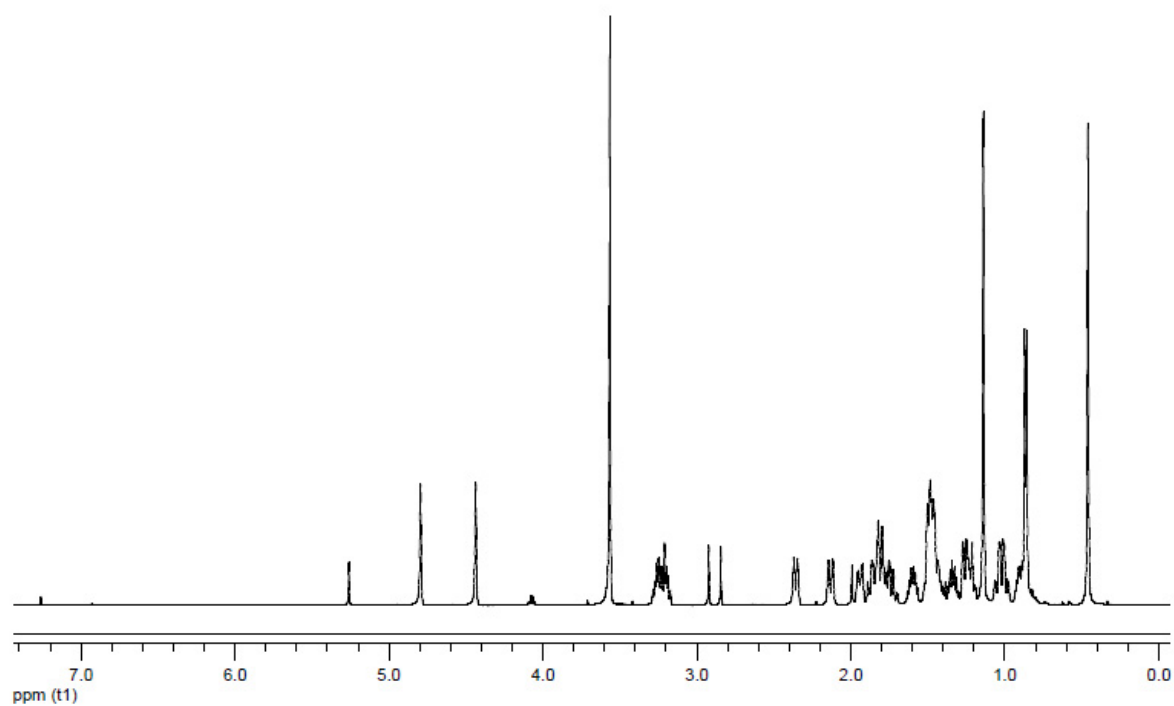

**Figure S2.**  $^{13}\text{C}$ -NMR of Compound **3**.

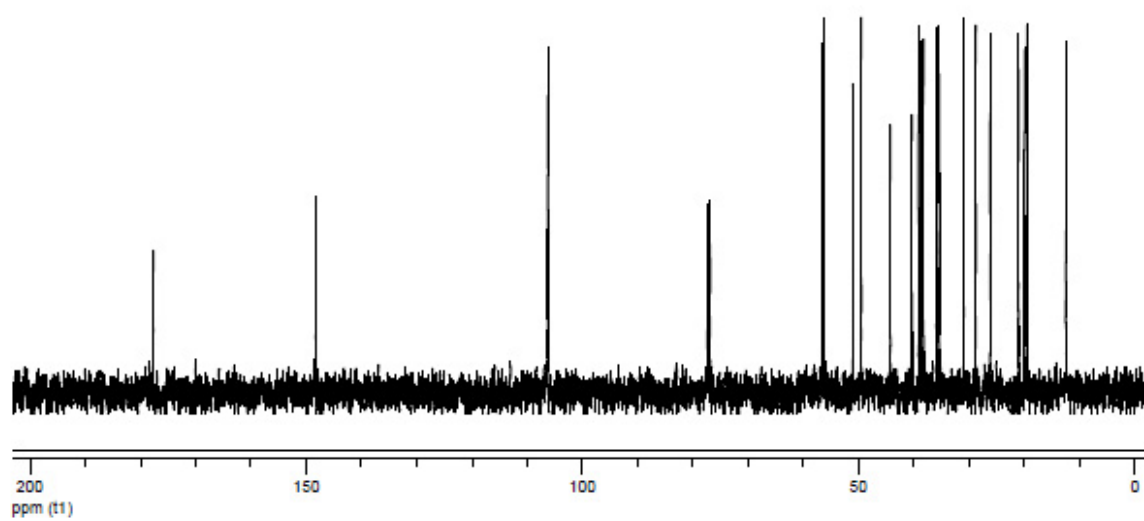

**Figure S3.** HMQC of Compound 3.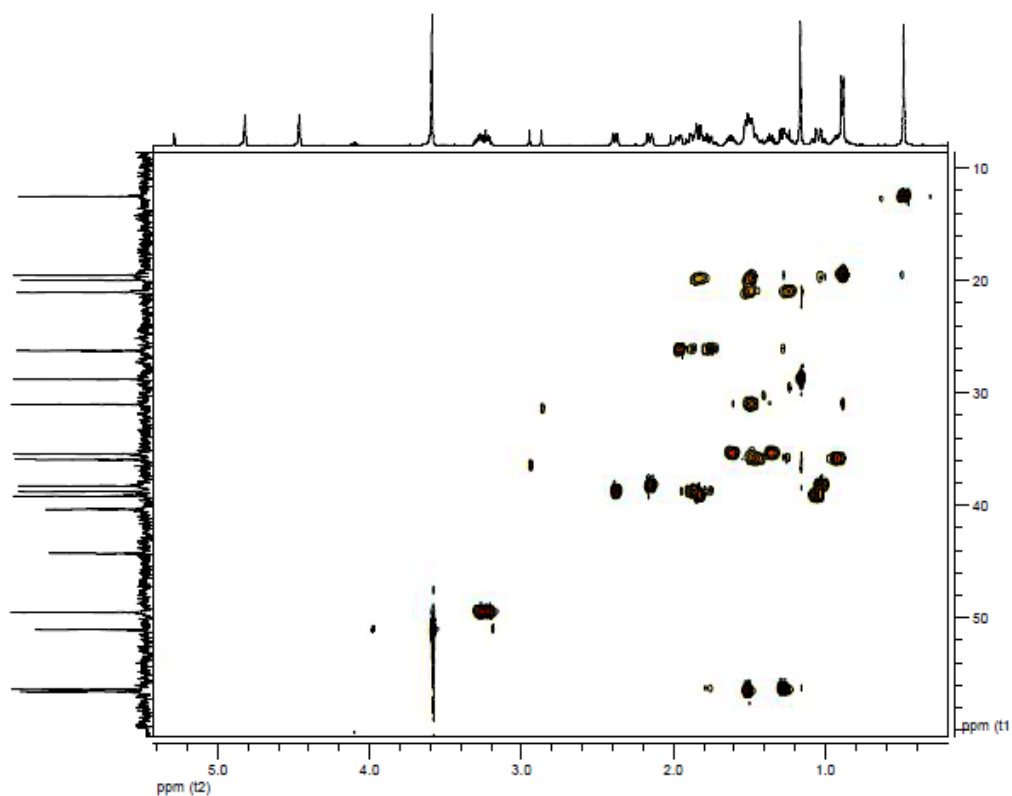**Figure S4.** HMBC of Compound 3.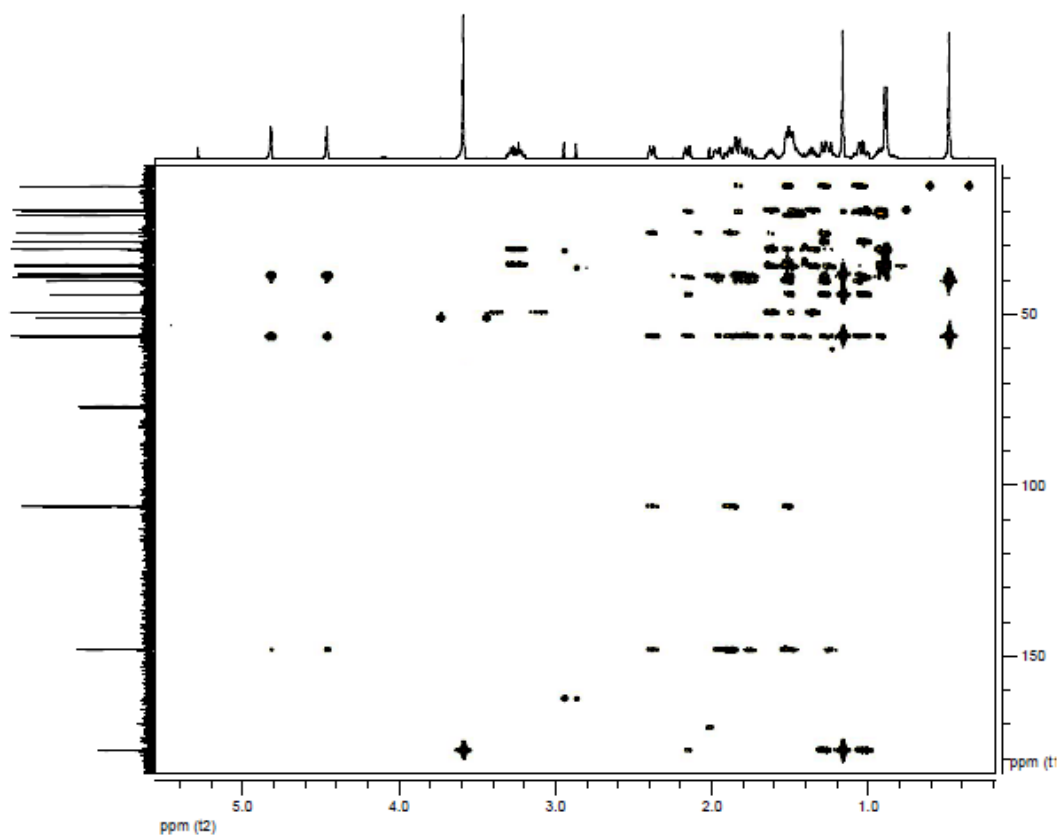

**Figure S5.**  $^1\text{H}$ -NMR of Compound 7.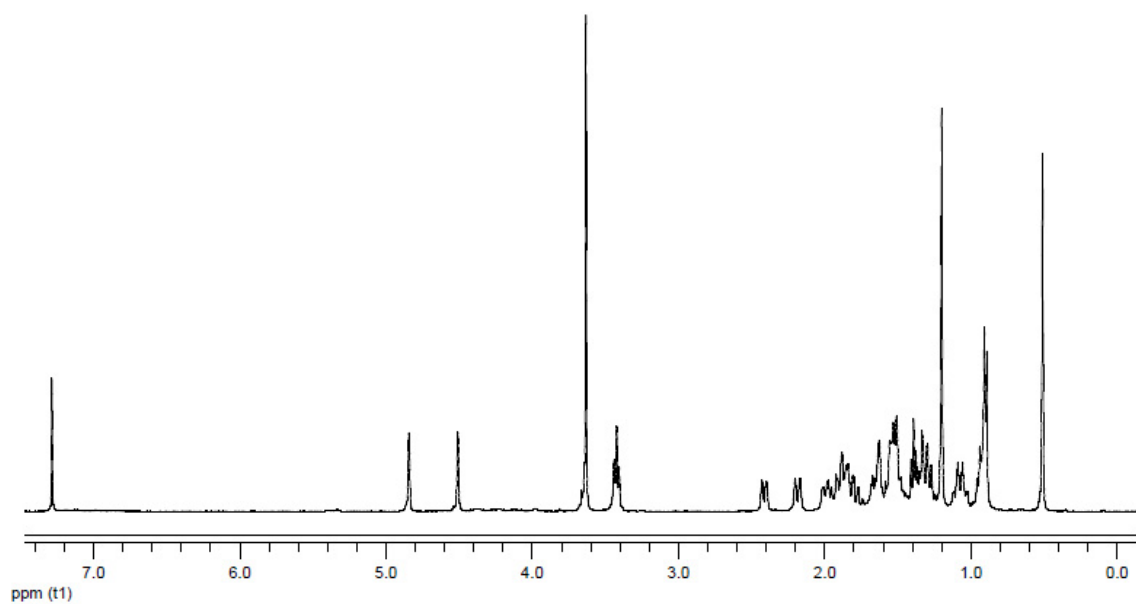**Figure S6.**  $^1\text{H}$ -NMR of Compound 9.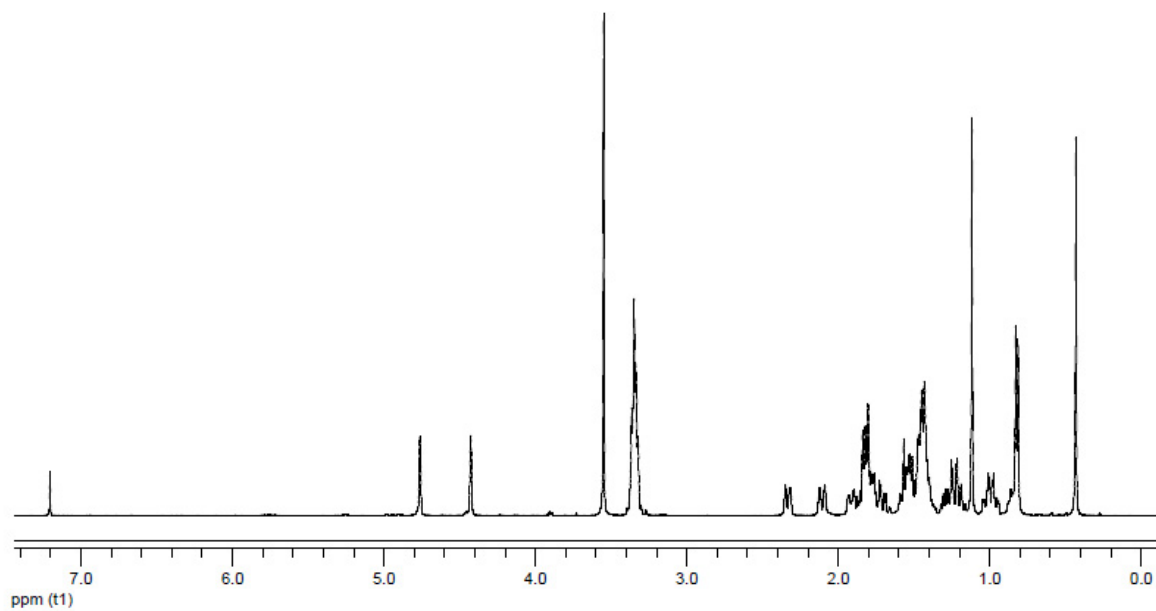

**Figure S7.**  $^{13}\text{C}$ -NMR of Compound 9.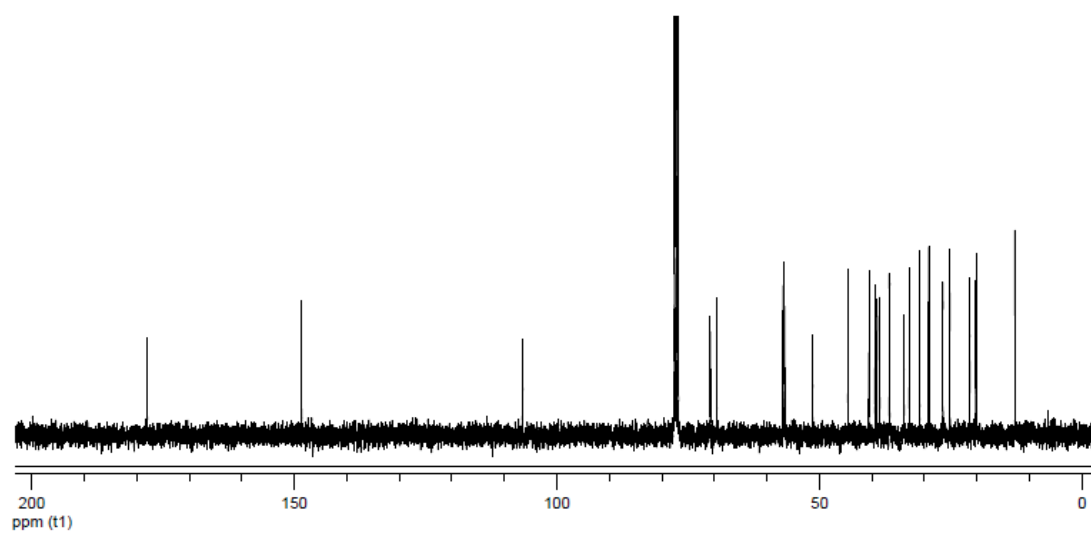**Figure S8.** HMBC of Compound 9.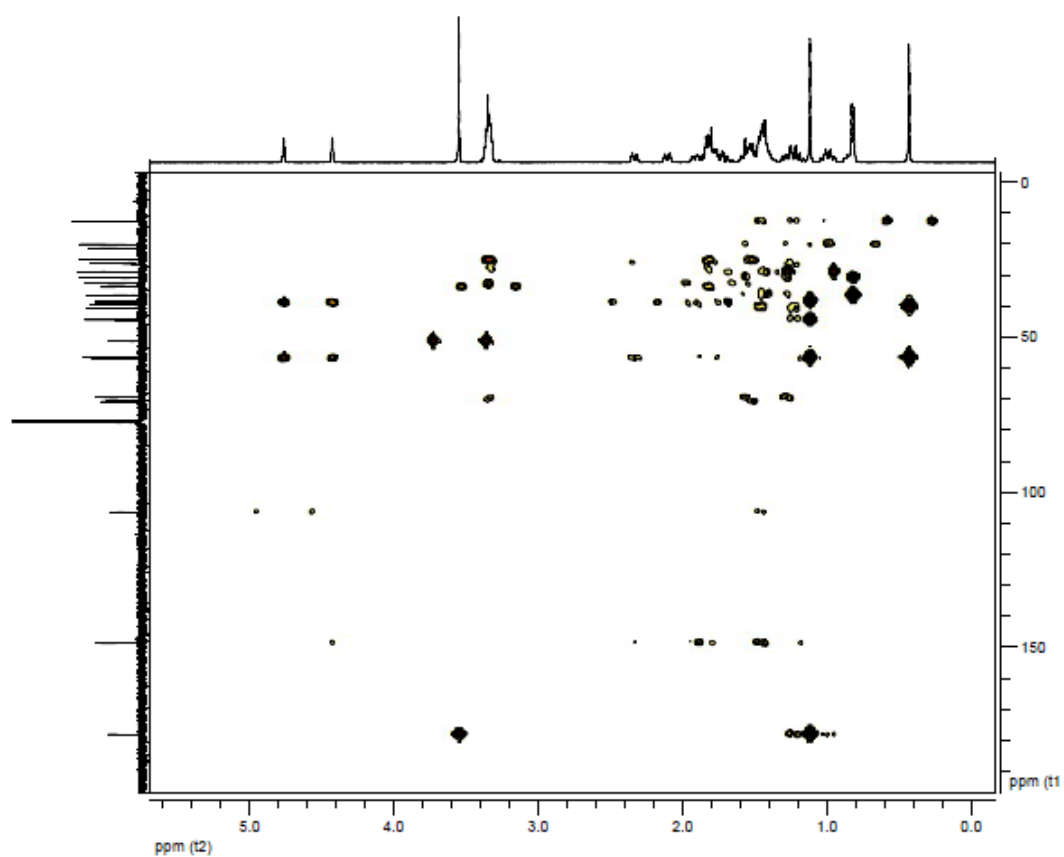

**Figure S9.**  $^1\text{H}$ -NMR of Compound 11.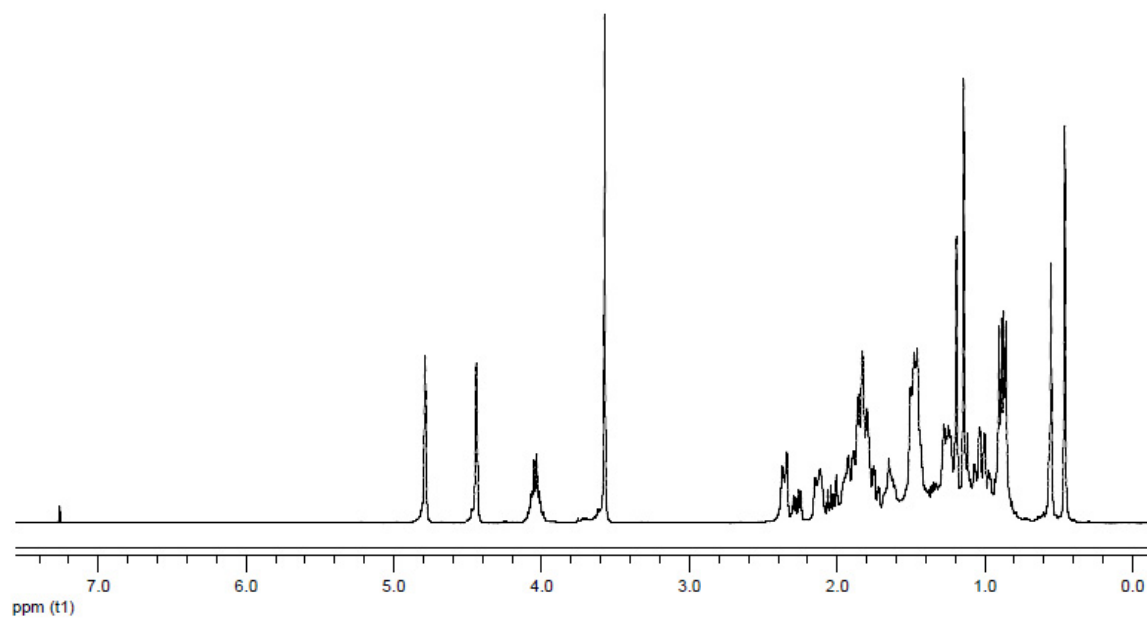**Figure S10.**  $^{13}\text{C}$ -NMR of Compound 11.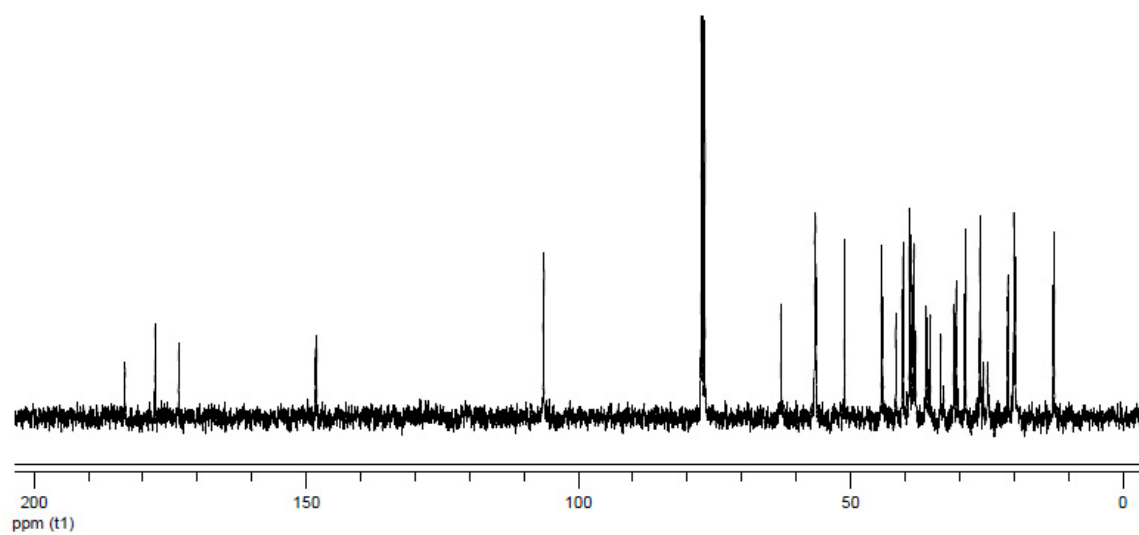

**Figure S11.**  $^1\text{H}$ -NMR of Compound 15.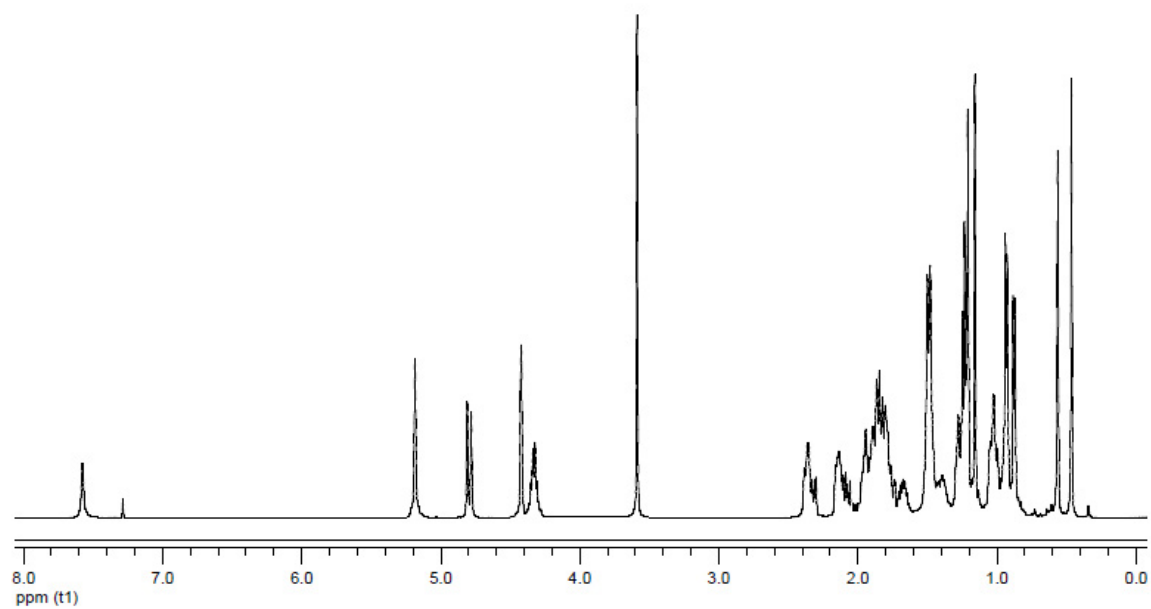**Figure S12.**  $^{13}\text{C}$ -NMR of Compound 15.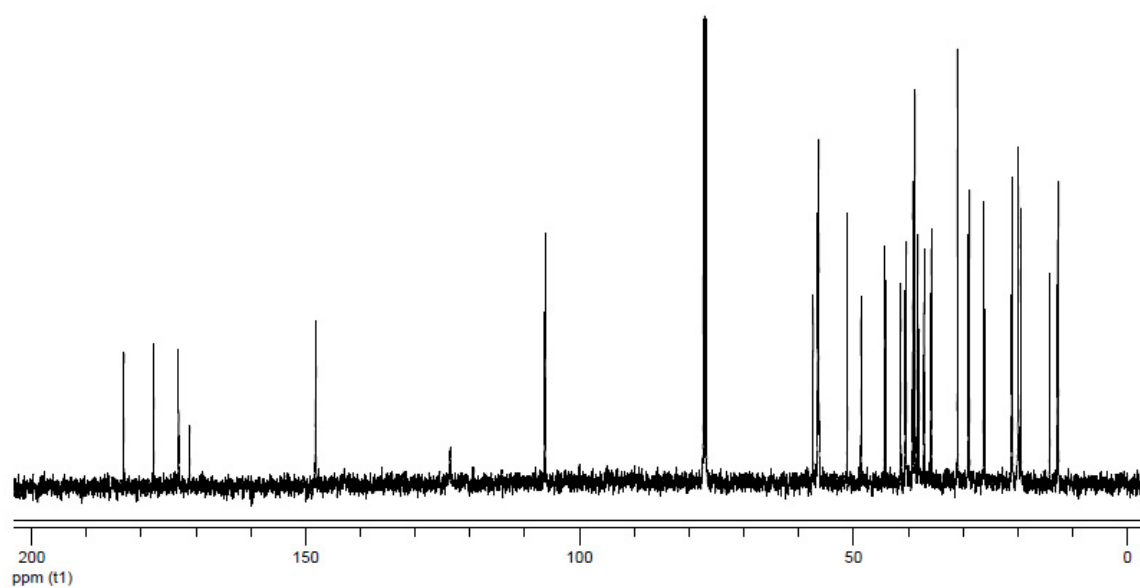

**Figure S13.** HMBC of Compound 15.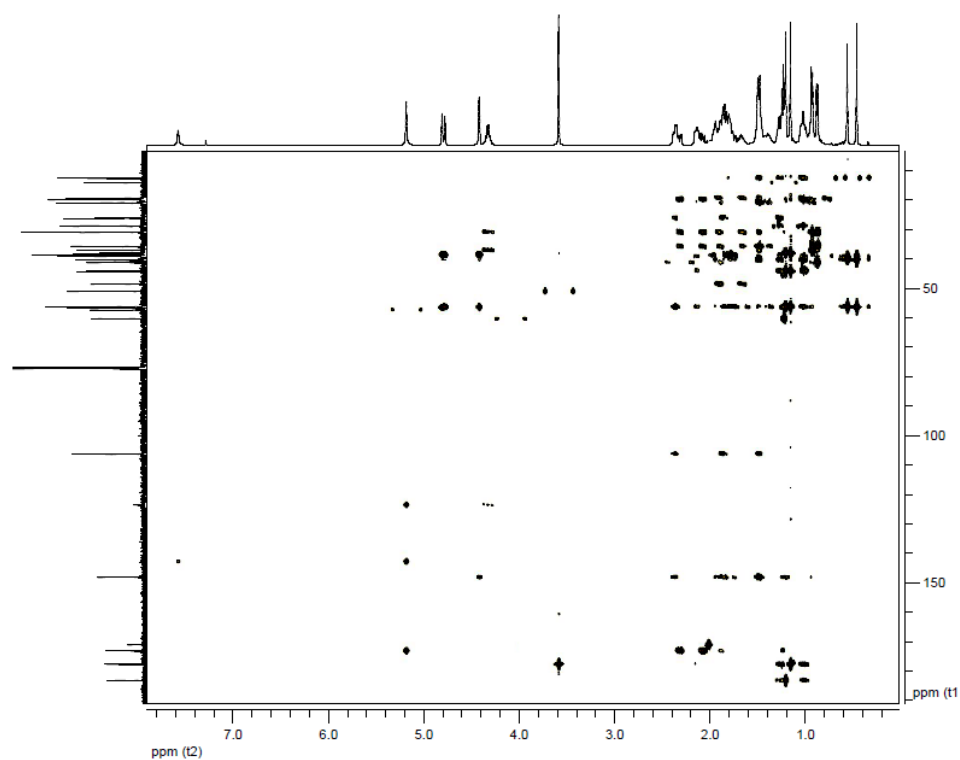**Figure S14.** COSY of Compound 15.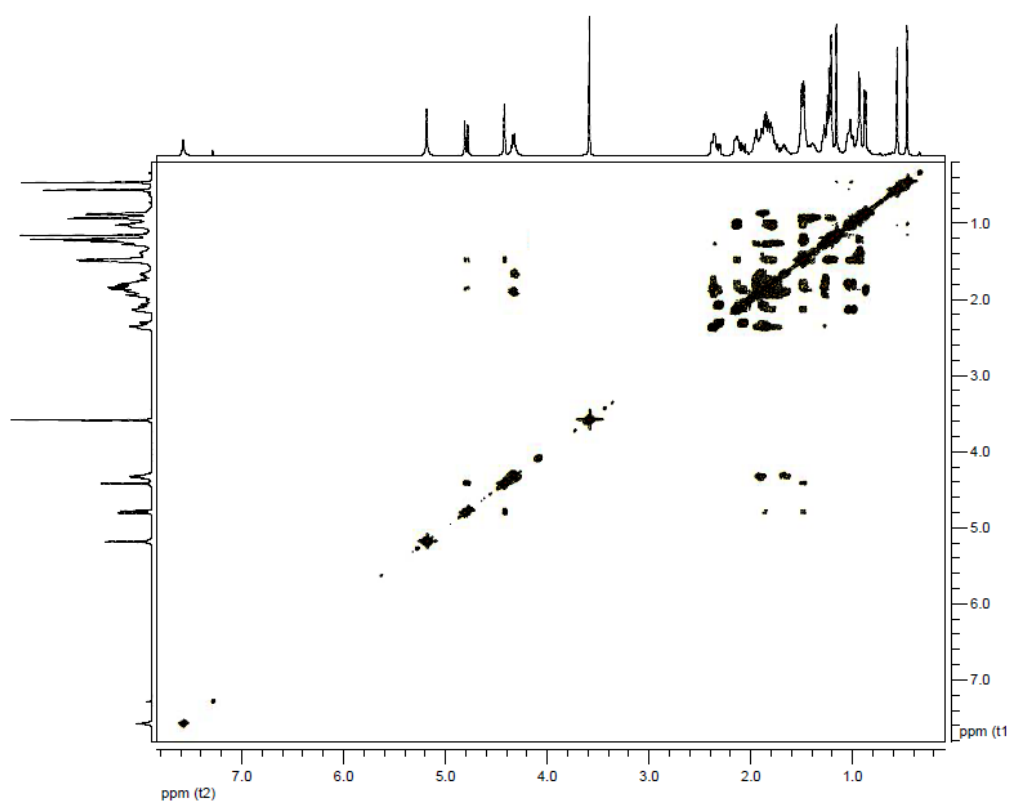

Supplement: Supplementary file 1 [file molecules-18-05936-s001.pdf]
